# Supplementary material
Source: publisher figshare collection journal article supplement (https://karger.figshare.com/ndownloader/files/37560850)
Supplement: Supplementary file 1 [file 37560850]

Supplementary Table 6.MMC placement subanalysis:Overall, complete, and qualified success rates at years 1 and 2 (PP population).

|  | Analysis visit | Group 1  (*n* = 36) | Group 2  (*n* = 25) |
| --- | --- | --- | --- |
| Overall success, % (*n/N*) |  |  |  |
| IOP ≥6 mmHg and  <21 mmHg | Year 1  Year 2 | 77.8 (28/36)  63.9 (23/36) | 84.0 (21/25)  92.0 (23/25) |
| IOP ≥6 mmHg and  <18 mmHg | Year 1  Year 2 | 75.0 (27/36)  61.1 (22/36) | 76.0 (19/25)  88.0 (22/25) |
| IOP ≥6 mmHg and  <14 mmHg | Year 1  Year 2 | 63.9 (23/36)  58.3 (21/36) | 76.0 (19/25)  84.0 (21/25) |
| Complete success, % (*n/N*) |  |  |  |
| IOP ≥6 mmHg and  <21 mmHg | Year 1  Year 2 | 52.8 (19/36)  38.9 (14/36) | 56.0 (14/25)  56.0 (14/25) |
| IOP ≥6 mmHg and  <18 mmHg | Year 1  Year 2 | 52.8 (19/36)  38.9 (14/36) | 56.0 (14/25)  56.0 (14/25) |
| IOP ≥6 mmHg and  <14 mmHg | Year 1  Year 2 | 44.4 (16/36)  33.3 (12/36) | 52.0 (13/25)  52.0 (13/25) |
| Qualified success, % (n*/N*) |  |  |  |
| IOP ≥6 mmHg and  <21 mmHg | Year 1  Year 2 | 25.0 (9/36)  25.0 (9/36) | 28.0 (7/25)  36.0 (9/25) |
| IOP ≥6 mmHg and  <18 mmHg | Year 1  Year 2 | 22.2 (8/36)  22.2 (8/36) | 20.0 (5/25)  32.0 (8/25) |
| IOP ≥6 mmHg and  <14 mmHg | Year 1  Year 2 | 19.4 (7/36)  25.0 (9/36) | 24.0 (6/25)  32.0 (8/25) |

Overall success was defined as patients who were not pressure or surgical failures, with or without glaucoma medication. A target pressure zone was defined as IOP ≥6 mmHg and <21, <18, or
<14 mmHg. Pressure failure was defined as patients with an IOP outside of the target pressure zone or without a decrease in IOP ≥20% from baseline on two consecutive scheduled follow-up visits after 3 months and did not achieve a decrease in IOP ≥20% from baseline at the last visit in which the success rate was reported. Surgical failure was defined as patients requiring reoperation in the operating room; bleb needlings were not considered a reoperation. Complete and qualified success were defined as above but without glaucoma medications and with glaucoma medications, respectively. IOP, intraocular pressure; MMC, Mitomycin C; PP, per-protocol.
